# Supplementary material for: Hyper-Range Amorphization Unlocks Superior Damage Tolerance in Alloys
Source: Research Square preprint supplement (doi:10.21203/rs.3.rs-6008946/v1), 2025-02-28
Supplement: Supplementary file 1 [file 87a3192339834ccb6c3716fe.docx]

Supplementary information for

**Hyper-Range Amorphization Unlocks Superior Damage Tolerance in Alloys**

Jinliang Du, Shukuan Guo, Hangqi Feng, Changhong Linghu, Weijie Li*, Pei Wang, Ying Li*

*Corresponding author: Email: weij_lee@bit.edu.cn (W. L.); bitliying@bit.edu.cn (Y. L.)

**The PDF file includes:**

Supplementary Note 1 Preliminary testing of alloys for damage resistance potential.

Supplementary Figs. S1 to S9

Supplementary Movies S1 to S4

Supplementary Note 1 Preliminary testing of alloys for damage resistance potential.

Ensuring enough space for dislocation extension and multiplication during deformation is crucial for achieving both strength and ductility. However, under high strain rate conditions, the rapid acceleration of dislocation motion, in addition to activating phonon drag and additional strengthening effects, typically leads to dislocation pile-ups and adiabatic shear. This raises a hypothesis: if all dislocations are mobile, the predicted ultimate strength will always exceed theoretical estimates, even when considering traditional scattering and hardening mechanisms. This subtle discrepancy suggests that alloys may possess untapped load-bearing potential. However, in practice, only a small portion of dislocations are mobile during deformation, and their density remains a difficult-to-quantify parameter. This introduces significant uncertainty into alloy performance. For example, during high strain rate tensile deformation (2×10⁻²/s), most dislocations can be activated, leading to superplasticity in MPEA 60. Enhancing the damage tolerance of alloys hinges on increasing the proportion of mobile dislocations at a given strain rate. Depending on load conditions and microstructure design, any dislocation can become mobile. Thus, addressing the damage tolerance issue requires designing dislocation pathways and adjusting strain rate changes.

We first propose the concept (**Figs. 1a**): If dislocations are aligned parallel to the load direction with enough space for migration, it may be possible to achieve larger-scale dislocation regulation, thereby reducing reliance on ultrahigh strain rates. This requires "confining" dislocations within a limited space to allow directional proliferation and migration. When compressive load is applied to alloy microcolumns, dislocation directions must be parallel to the stress axis. It is well known that the eutectic MPEA in the additive manufacturing CoCrAlFeNi system (**Supplementary** **Figs. S1-3**) separates the hard BCC phase from the soft FCC phase through nanoscale interphase boundaries, providing a unique opportunity to nucleate micro-shear band voids within small-scale regions. Moreover, amorphization has been observed in most alloys, including the CoCrAlFeNi system, and eutectic MPEA also has the potential to form an amorphous phase.

We used FIB to extract microcolumns from eutectic clusters (111) located by IPF, confirming that the phase boundaries are parallel to the stress direction (**Supplementary Figs. 1b-d**). The matrix exhibits the standard BCC and FCC lattices in the (110) direction, providing a reference for subsequent theoretical calculations to model the system. The parallel phase boundaries, under strong bonding, allow dislocations to preferentially migrate and diffuse along this low-energy channel over long distances (**Fig. 1d**). Under high-stress conditions, dislocations may serve as dislocation sources and proliferate near the phase boundaries via reactions or climb, avoiding surface proliferation. It has been noted that nano-precipitates exist in eutectic MPEA. However, after our microscale pre-compression tests, dislocations still exhibited characteristics of proliferation along the phase boundaries in eutectic MPEA (**Supplementary** **Fig. S4**), which preliminarily verifies that the interference from secondary phases can be neglected in our design.

For FCC/BCC stacking structures, phase boundaries act as early obstacles to dislocation slip, making it difficult to traverse multiple phase boundaries, thus increasing top stress concentration and the possibility of non-uniform shear band nucleation at the phase boundary (**Supplementary** **Fig. S4**). Selecting the target alloy and customizing the dislocation slip direction is the first step in exploring the damage tolerance of alloys.


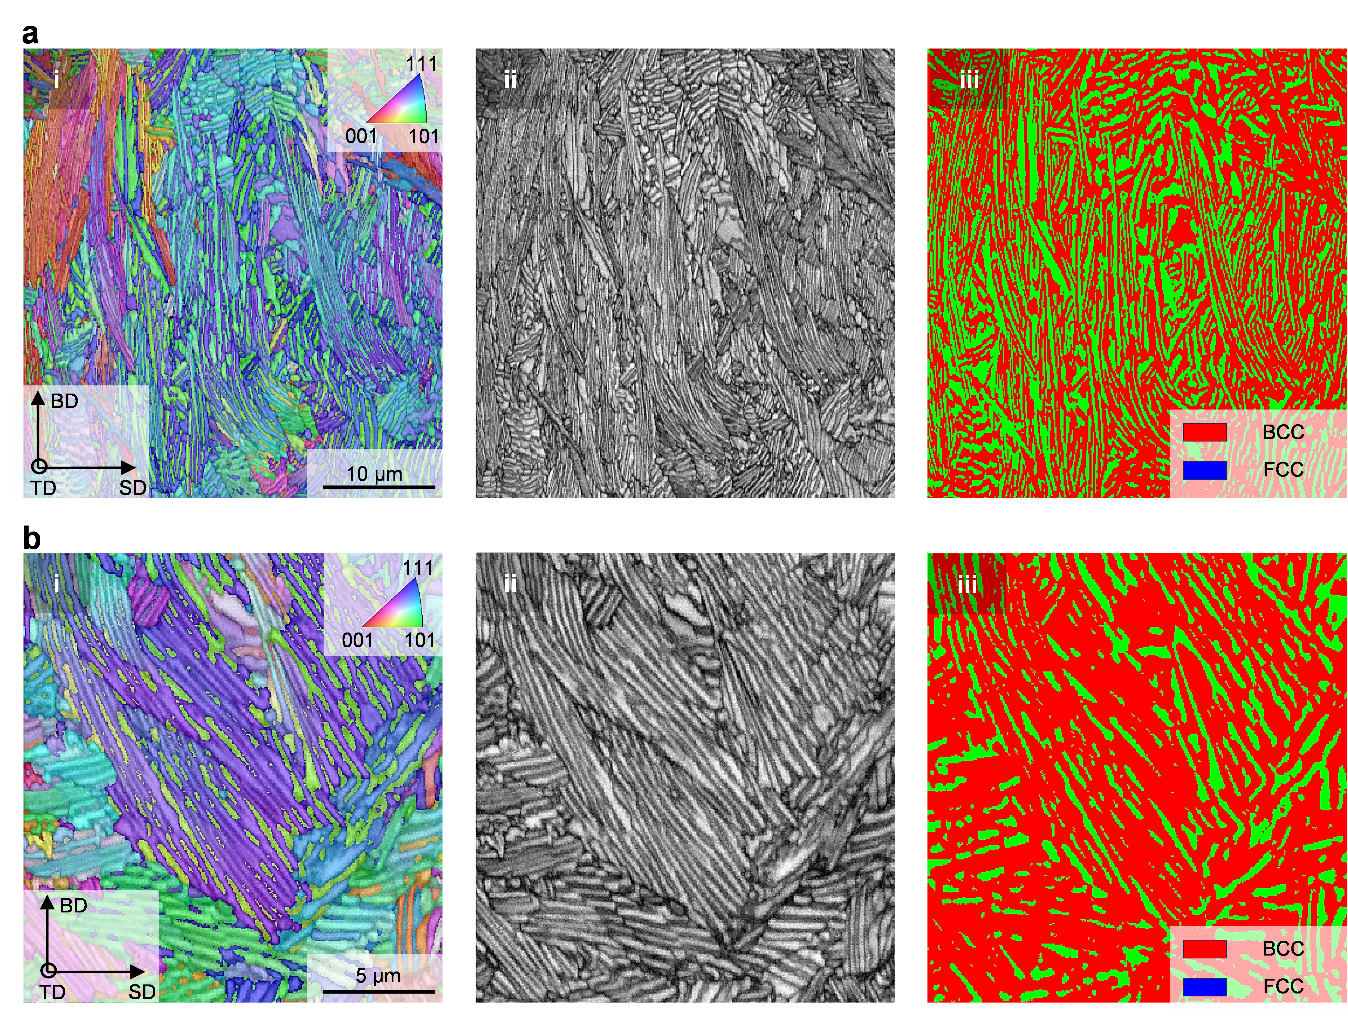


**Fig. S1 Microstructure of the initial eutectic MPEA characterized using EBSD.** (**a**) and (**b**) are the antipodal plots (IPF, **i**), image quality maps (IQ, **ii**), and phase diagrams (**iii**) of the block samples relative to the overall and localized positions.


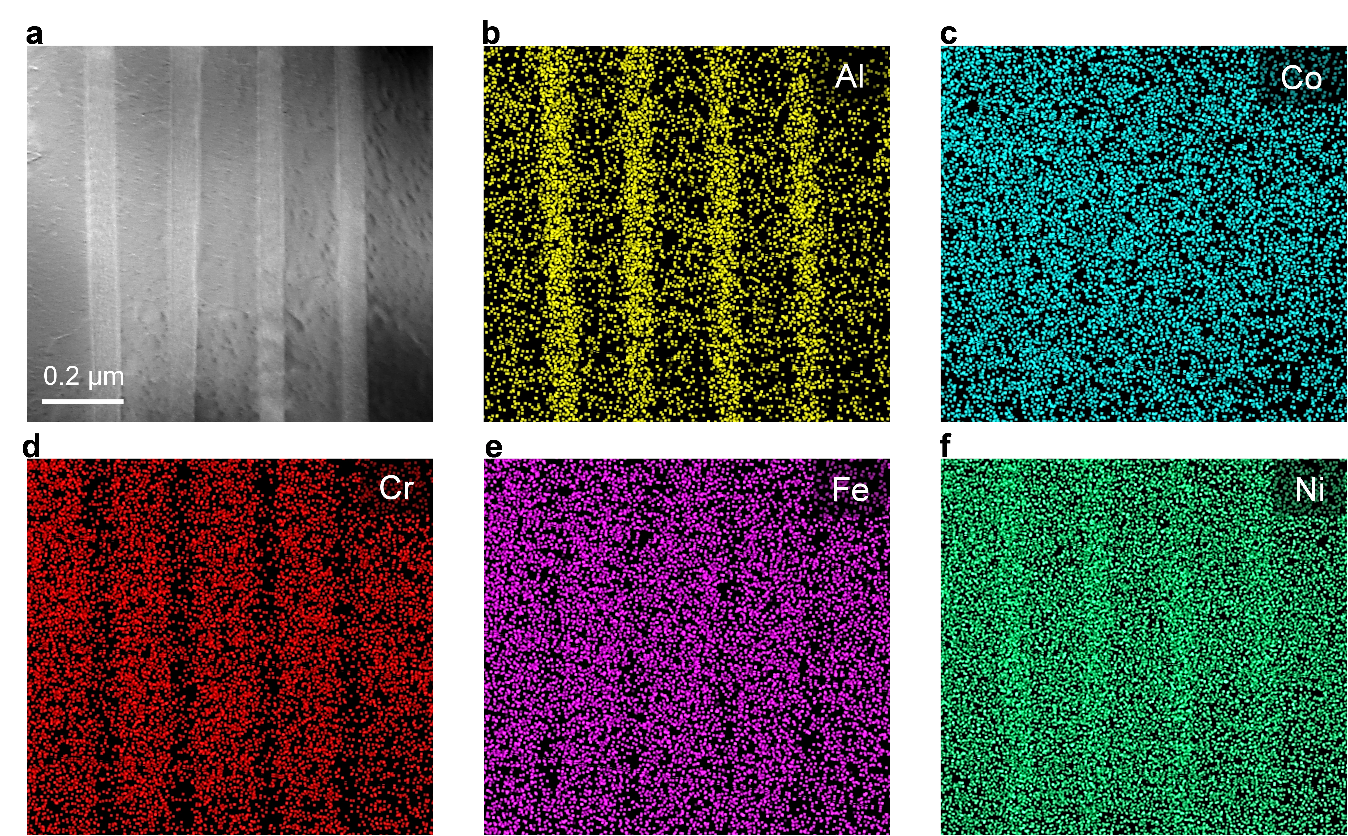


Fig. S2. Initial microstructure and elemental distribution of the micropillar. (a) High-angle annular dark field imaging (HAADF). (b-f) Distribution of Co, Cr, Al, Fe, and Ni. Al and Ni elements (b, f) are found to segregate within the BCC phase, while Co (c) is more uniformly distributed. Cr and Fe (d, e) segregate in the FCC phase. Combined with XRD results, it is evident that the BCC phase is an intermetallic compound, similar to a Co-containing NiAl phase, while the FCC phase is a solid solution, resembling the CoCrFeNi system. These results support the microstructural conditions of the prepared samples and the subsequent calculation of stacking fault energy.


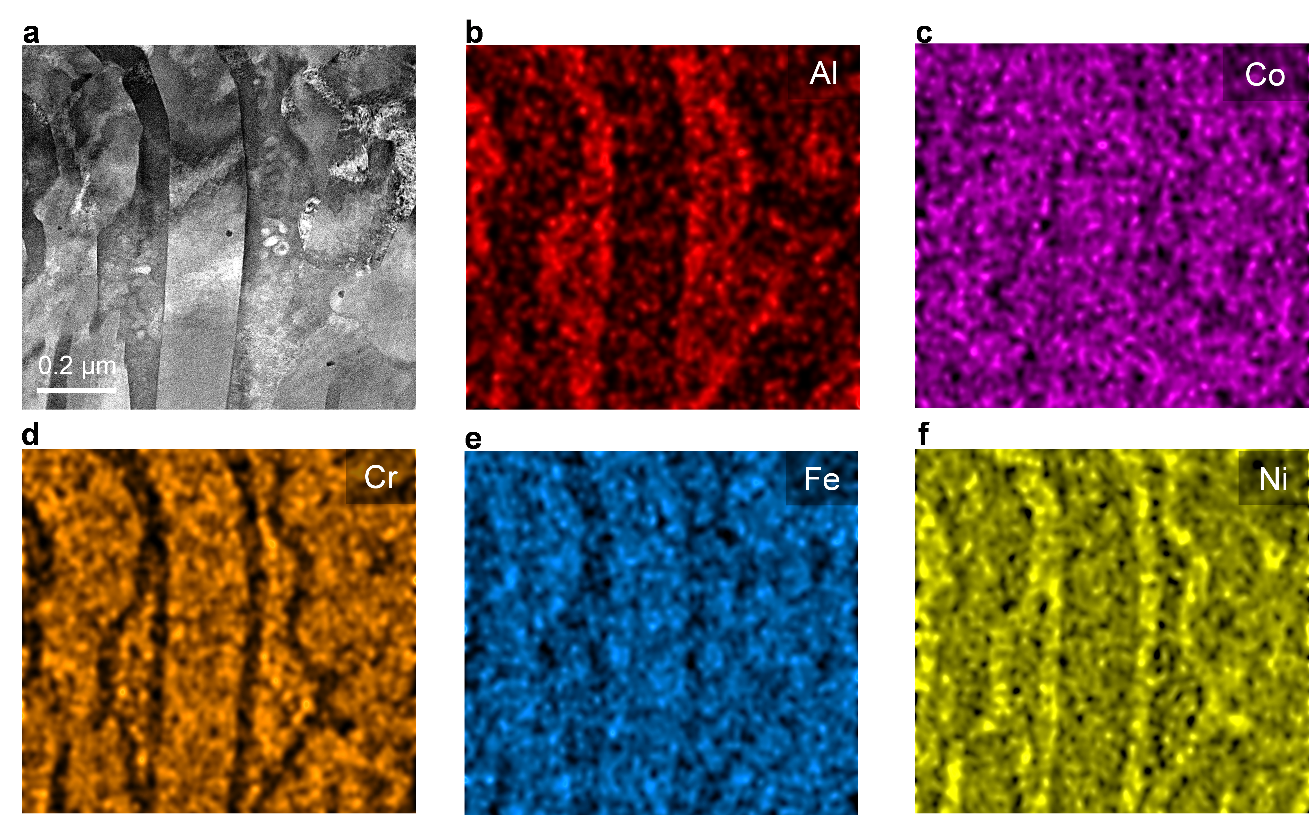


Fig. S3. Elemental distribution in the microstructure after multi-stage strain-rate compression. (a) Microstructural morphology. (b-f) Elemental distribution of Al, Co, Cr, Fe, and Ni. The results show no significant changes in elemental distribution due to deformation, with the elements retaining their initial distribution patterns.


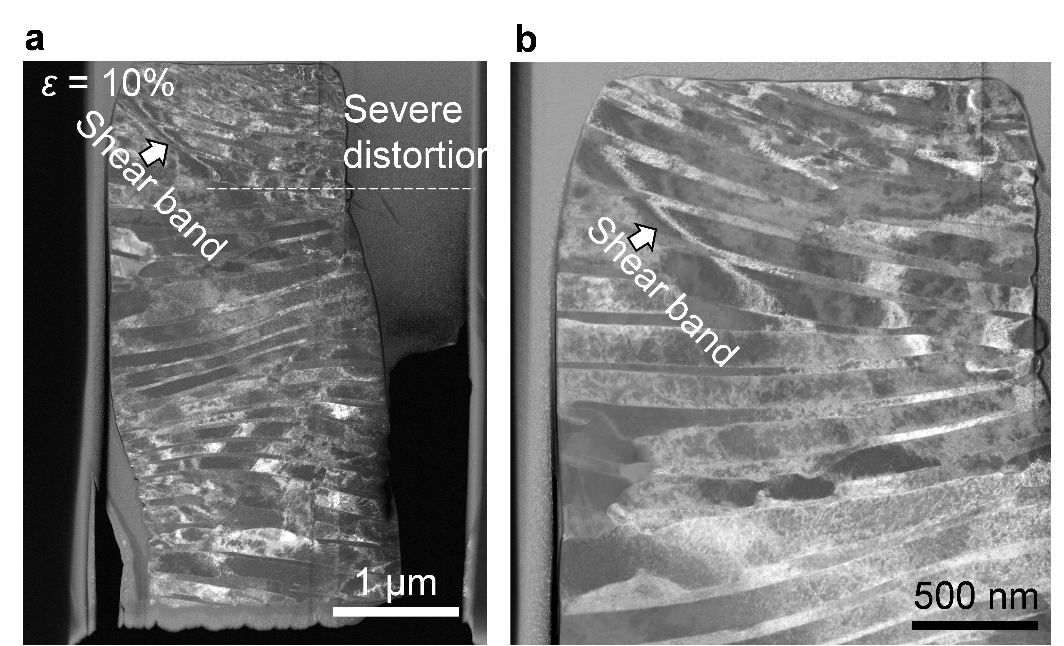


**Fig. S4. TEM morphology of the stacked structure micropillars after 10% deformation.** (**a**) The overall morphology shows significant deformation and shear bands at the top, and the micropillars tilt as a whole under load. (**b**) A local enlargement of the top.


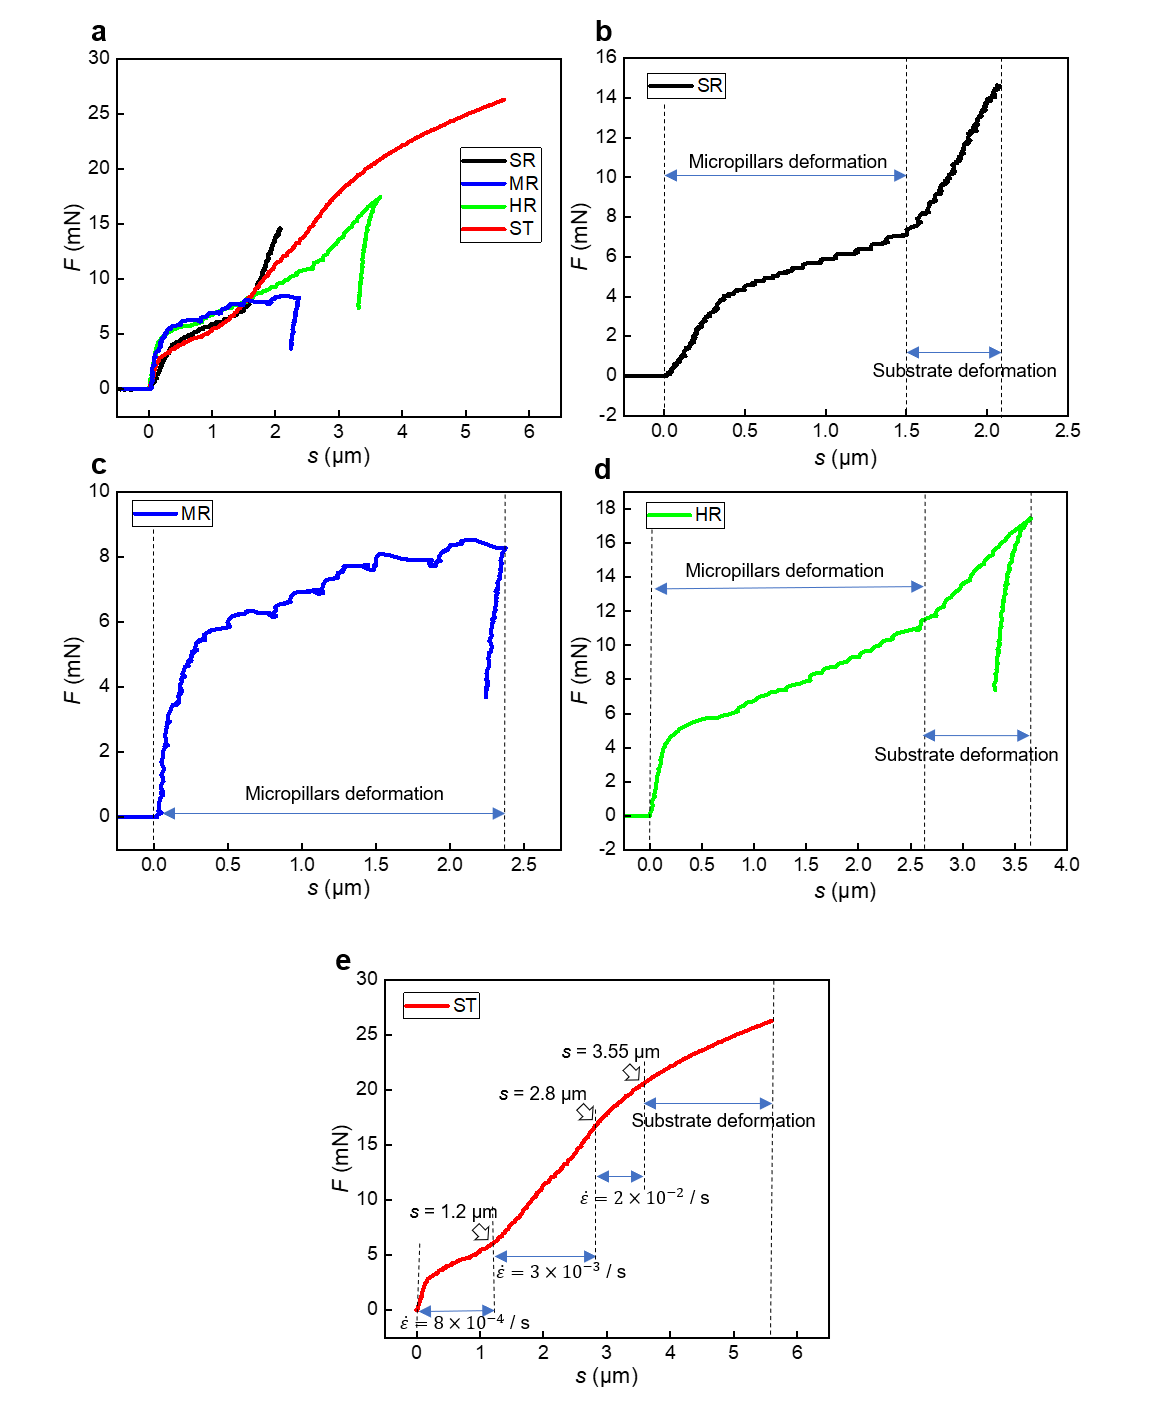


**Fig. S5. Raw force-displacement (*F*-*s*) curves used to characterize microcolumn mechanics. (a)** All mechanical curves of microcolumns undergoing SR, MR, HR, and ST loading. These conditions are shown independently in **(b-e)**, where the unfailed micropillar was sufficiently hardened to cause deformation of the substrate after completing deformation.


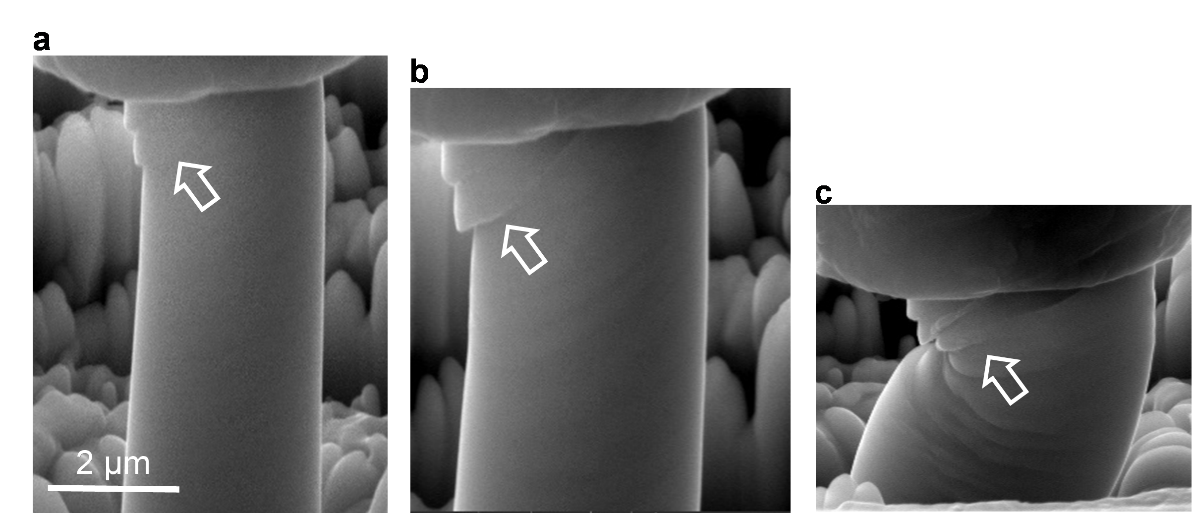


Fig. S6. Failure process of the micropillar under compression at a strain rate of 3×10⁻³/s. (a) Shear band formation is observed at 15% strain. (b) As strain increases to 20%, the shear band becomes more pronounced. (c) When the strain reaches 35.9%, the substrate deformation begins to bear the stress, at which point the strain is halted.


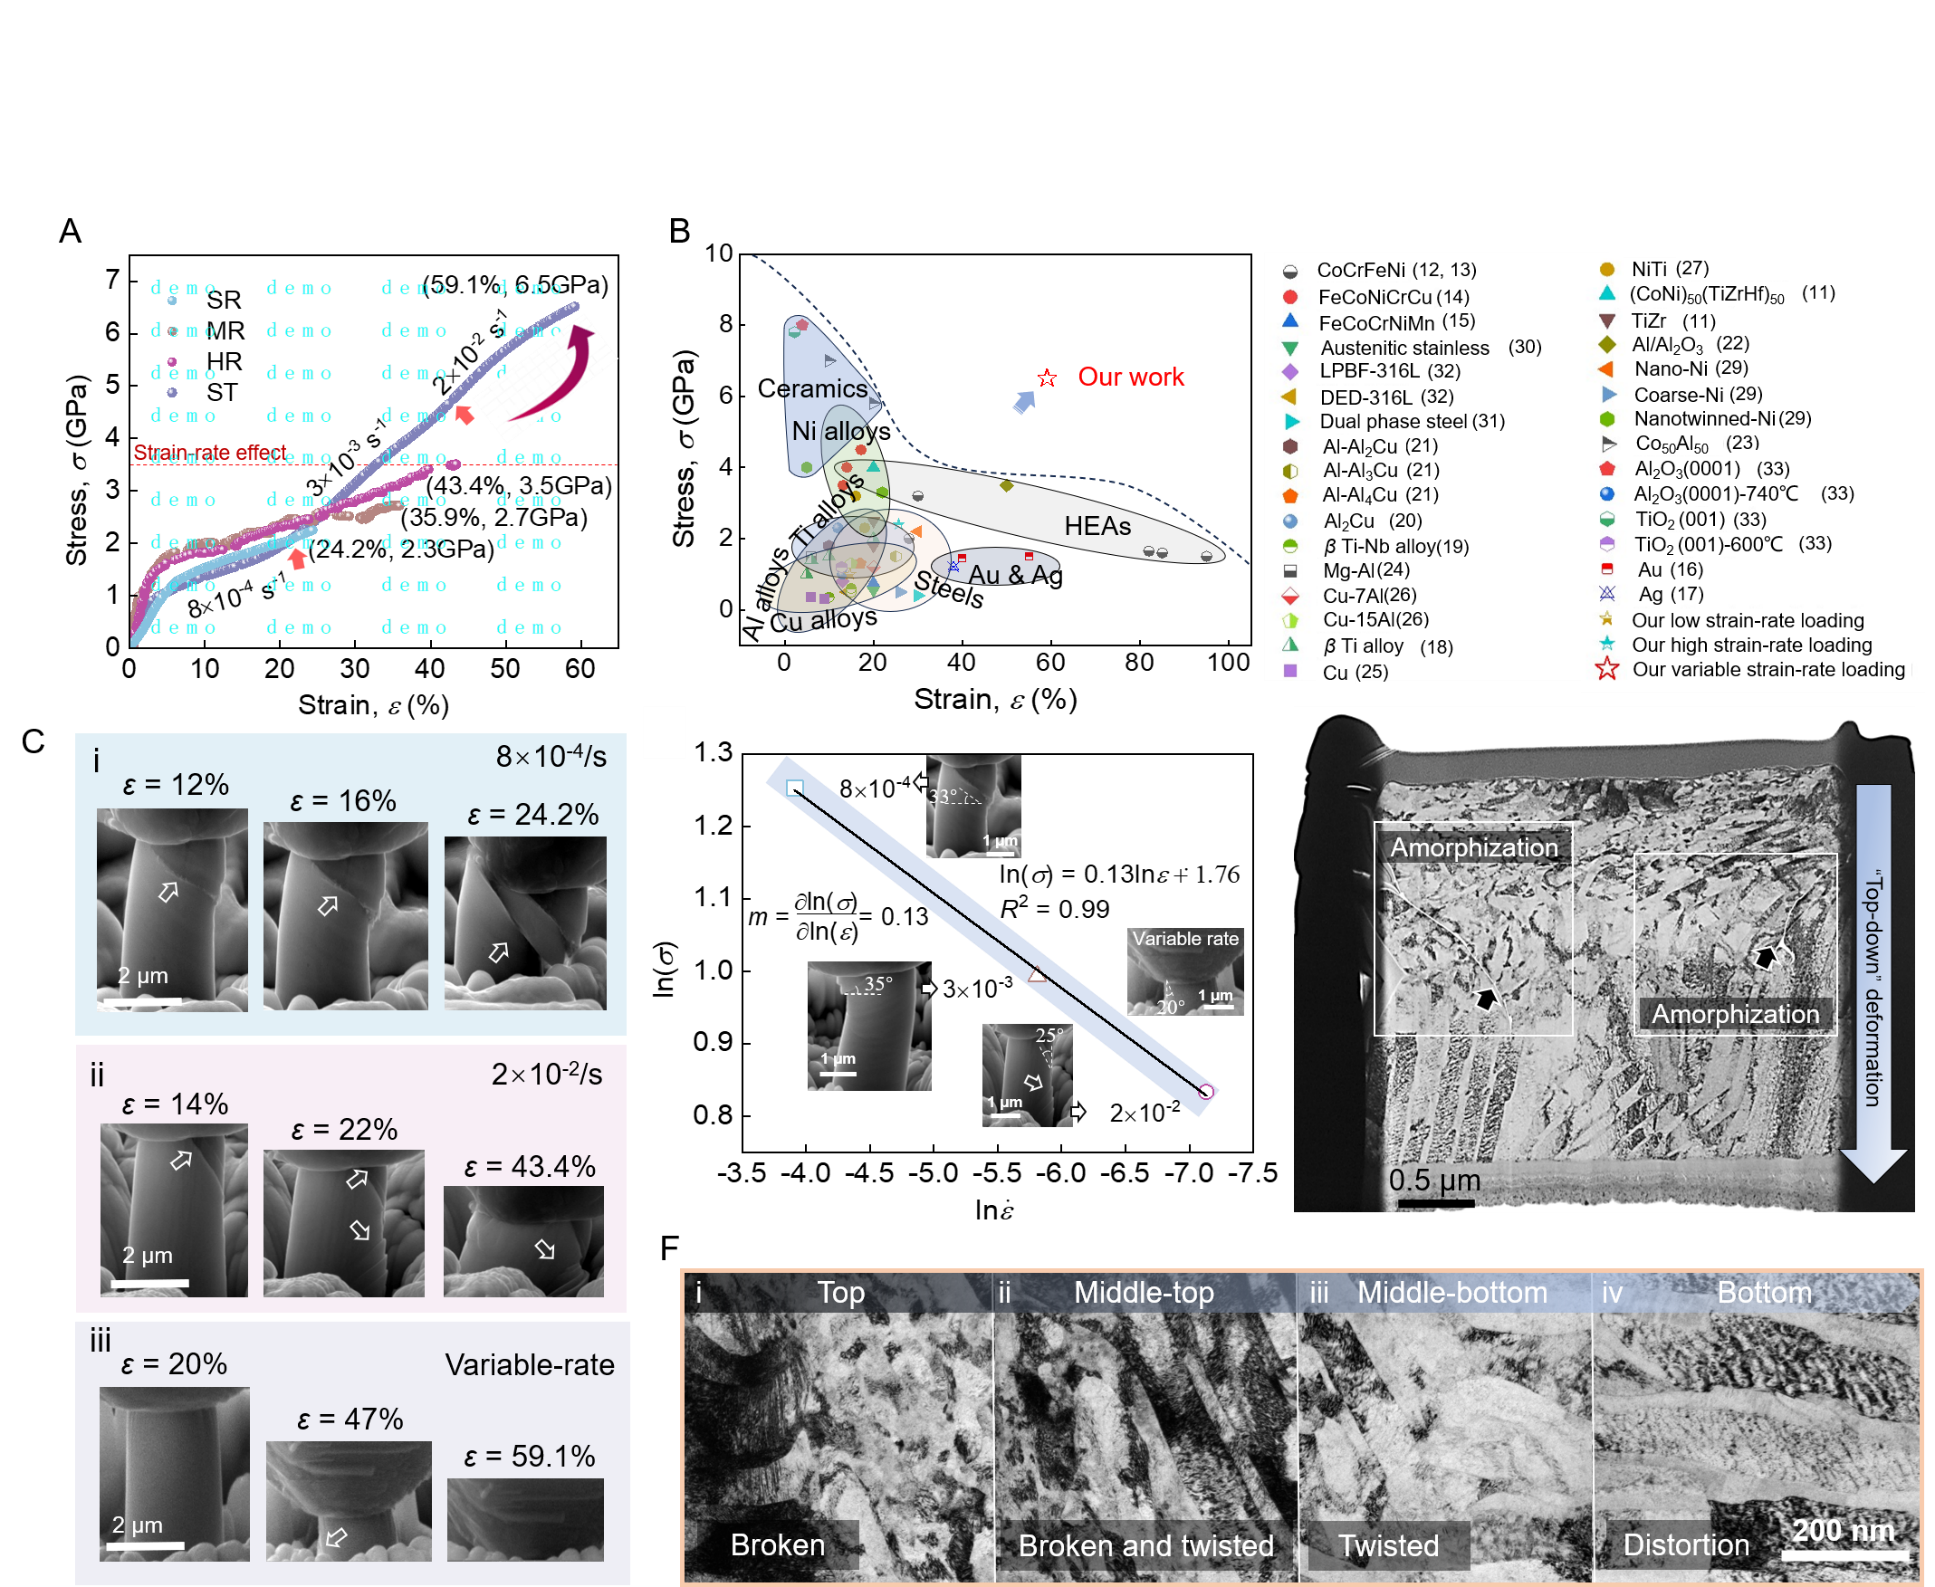


**Fig. S7. Strain sensitivity calculations reveal the stable performance of alloy micropillars.**


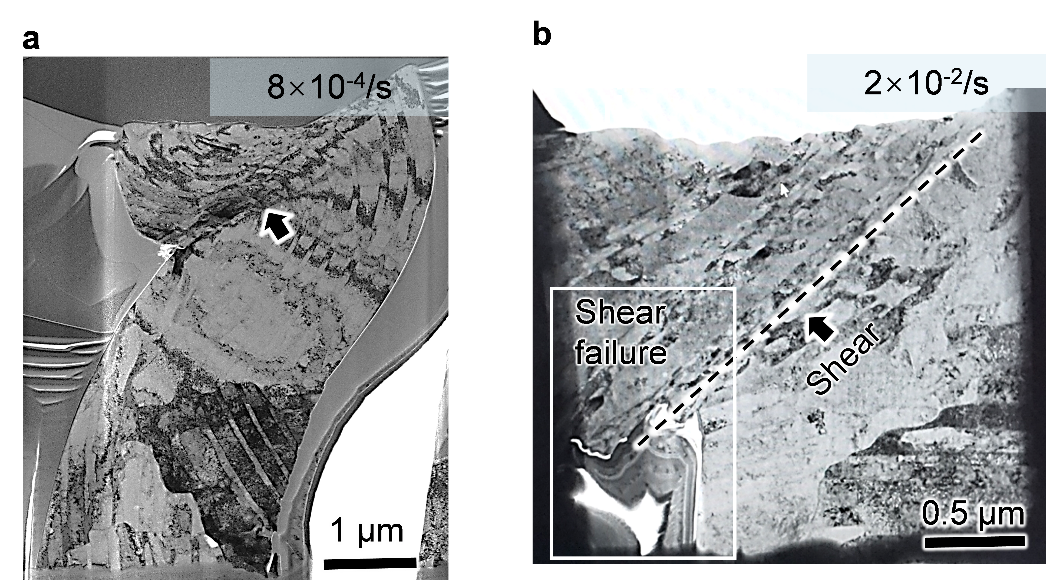


**Fig. S8. TEM characterization of slow-rate and high-rate loading. (a)** Top shear under slow-rate loading. **(b)** Severe failure under high-rate shear.


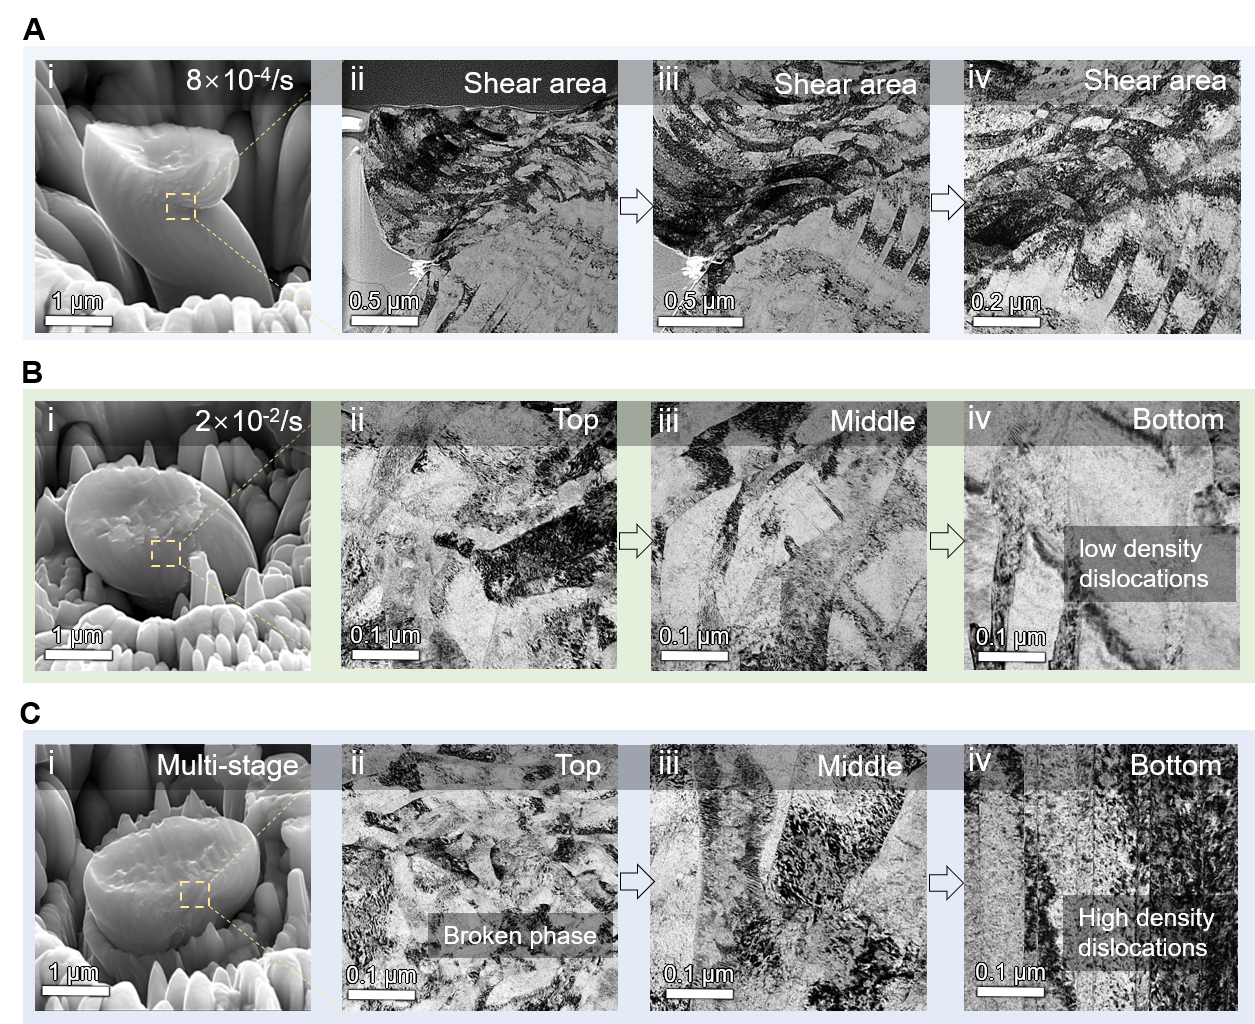


Fig. S9. Deformation modes of micropillars under compression at different strain rates. (a) Deformation at low strain rates exhibits severe shear failure, so compression was halted before complete failure to ensure intact TEM sample preparation. TEM images (i-iv) show that strain is concentrated in the upper section, where the phases bend significantly under shear stress without fracturing, indicating strong phase interface bonding and excellent shear toughness. (b) High strain rate compression displays a typical shear failure mode. The microstructure at the top of the micropillar is distorted, with stress sequentially transmitted downward over short distances (i-iv). (c) Multi-stage strain-rate compression enables substantial deformation of the micropillar without shear bending. The phase structure at the top is severely fragmented, the middle section twisted, and the bottom accumulates an extremely high dislocation density (i-iv).

**Supplementary Movies**

**Movie S1**

Video of in situ SEM compression strain tests of MPEA micropillar at SR.

**Movie S2**

Video of in situ SEM compression strain tests of MPEA micropillar at MR.

**Movie S3**

Video of in situ SEM compression strain tests of MPEA micropillar at HR.

**Movie S4**

Video of in situ SEM compression strain tests of MPEA micropillar at ST.
